# Supplementary material for: Neuron–Glia Interactions in Tuberous Sclerosis Complex Affect the Synaptic Balance in 2D and Organoid Cultures
Source: MDPI journal article supplement (doi:10.3390/cells10010134), 2021-01-12

**EIF4G2**

Day 60 astrocytes

control

TSC

H2O

Day 90 astrocytes

control

TSC

Day 60 astrocytes

control

TSC

H2O

Day 90 astrocytes

control

TSC

**EFEMP1**

Day 60 astrocytes

control

TSC

H2O

Day 90 astrocytes

control

TSC

**CALB1**

Day 60 astrocytes

control

TSC

H2O

Day 90 astrocytes

control

TSC

**INOS**

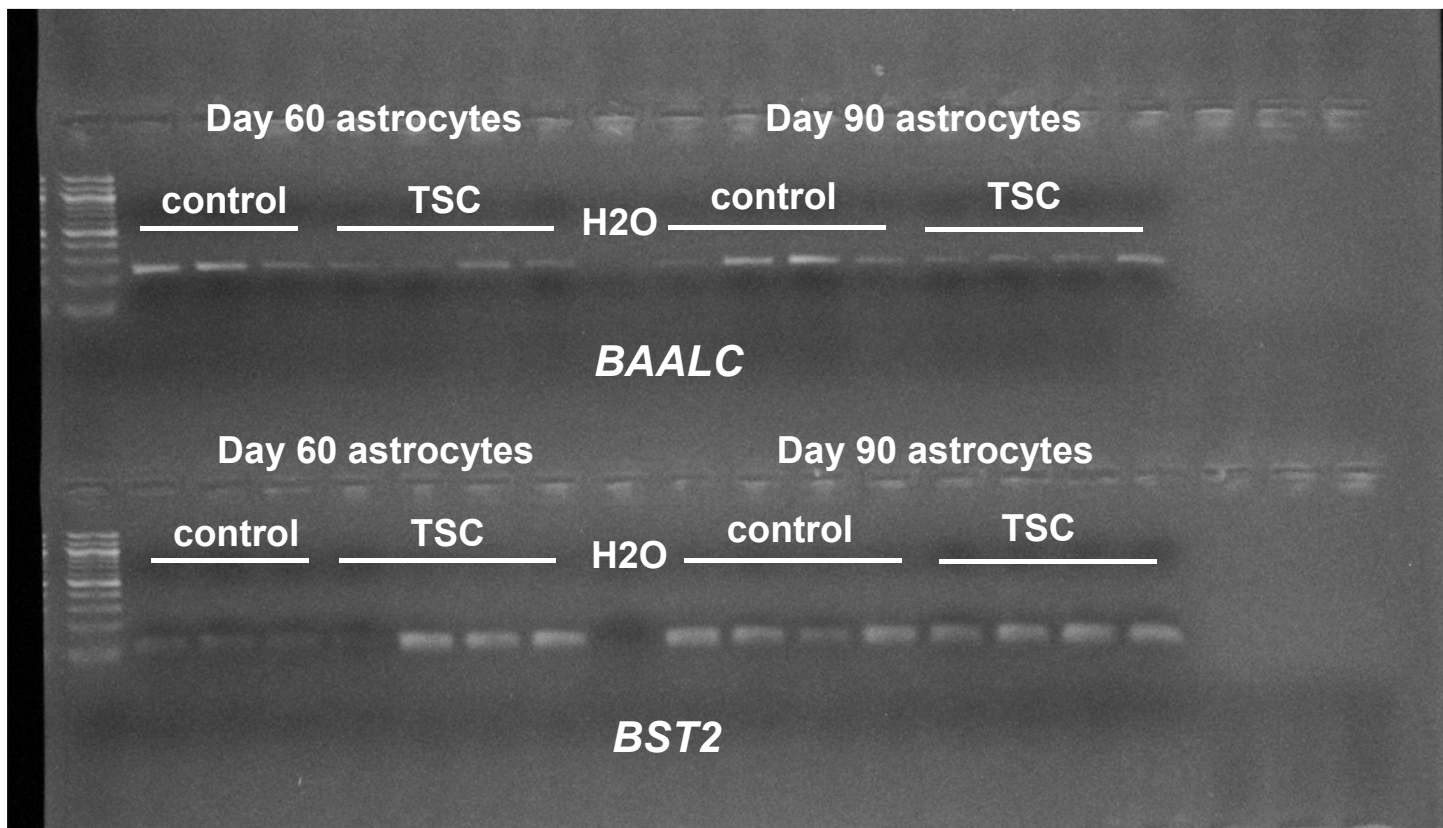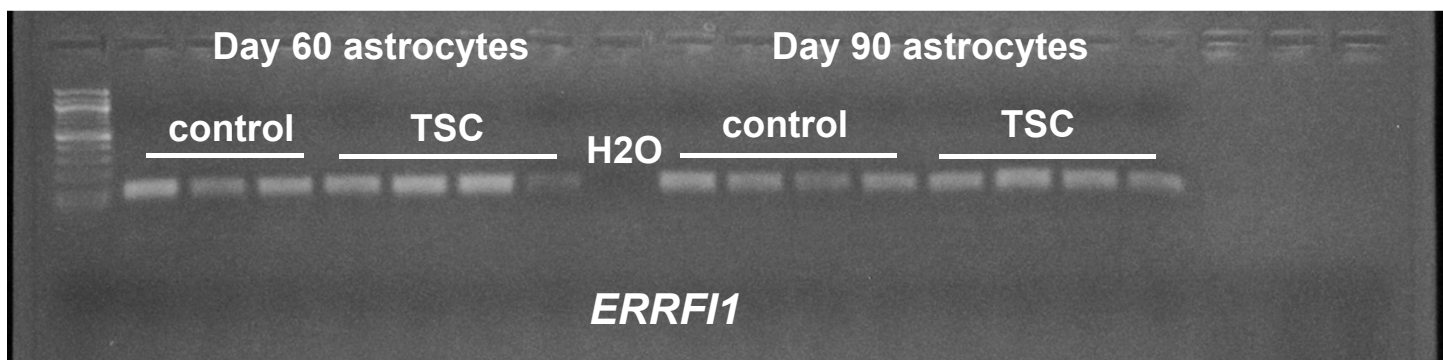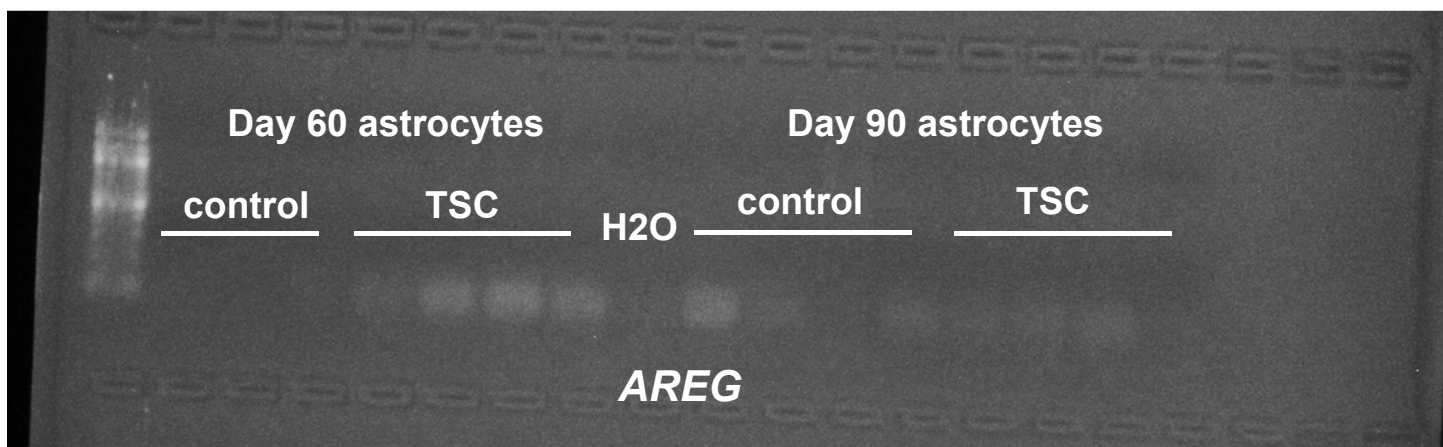

Supplement: s1 [file s1]
