# Supplementary figures and images for: Neuron–Glia Interactions in Tuberous Sclerosis Complex Affect the Synaptic Balance in 2D and Organoid Cultures
Source: MDPI journal article supplement (doi:10.3390/cells10010134), 2021-01-12

Figure S1. Organoids of the same iPSC line show stable mRNA expression patterns

A

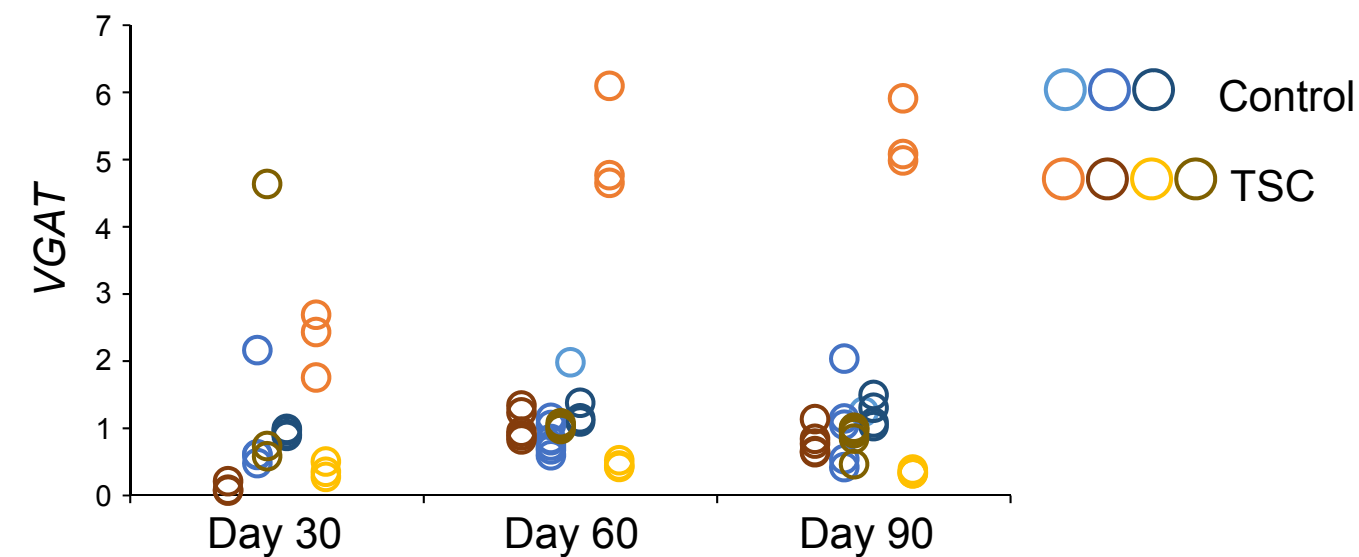

B

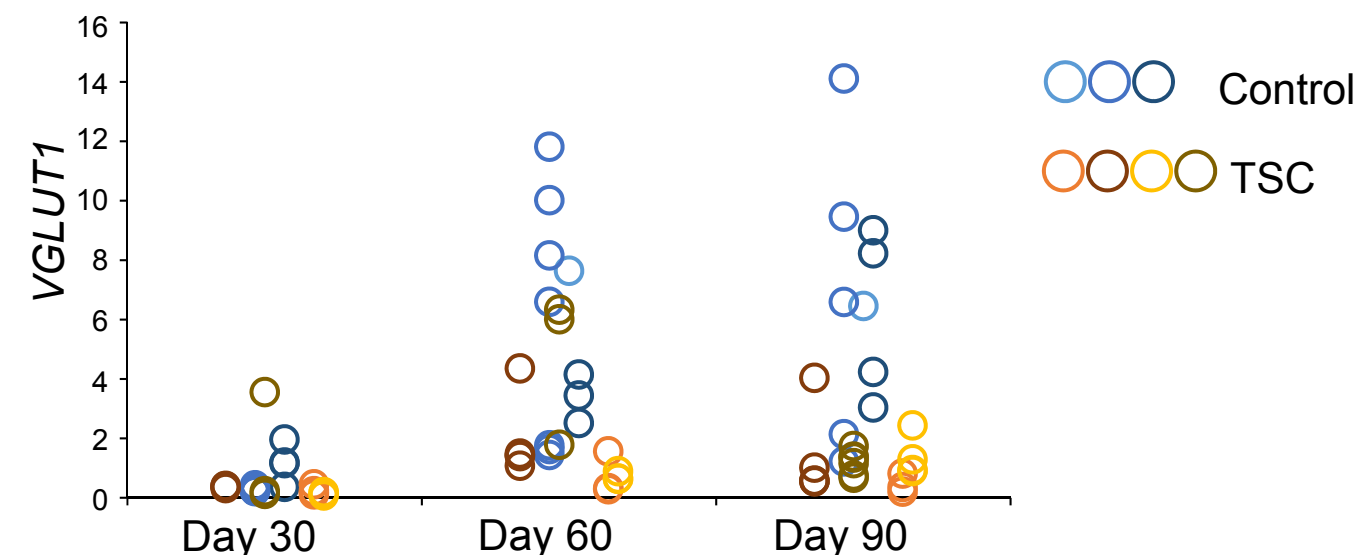

Supplement: s1 [file s1]
